# Supplementary material for: Factors contributing to chronic ankle instability: a protocol for a systematic review of systematic reviews
Source: Springer Nature journal article supplement (doi:10.1186/s13643-016-0275-8), 2016-06-07
Supplement: MOESM2 [file 10245192]

## **Additional file 2. Search strategies**

### **CINAHL**

((MH "Review") OR (MH "Meta-Analysis") OR (MH "Meta-Analysis as Topic") OR systematic review OR meta-analysis OR meta analysis) AND ((MH "Ankle") OR (MH "Ankle Joint") OR (MH "Lateral Ligament, Ankle") OR ankle\* OR talocrural OR talo-crural OR talo-calcaneal) AND ((MH "Ankle Injuries") OR (MH "Sprains and Strains") OR (MH "Joint Instability") OR sprain OR injur\* OR instability\*) AND ((MH "Cumulative Trauma Disorders") OR (MH "Chronic Pain") OR perceived OR repetitive OR functional OR mechanical OR recurrent OR repeated OR chronic)

### **PubMed**

((((((((((Cumulative trauma disorders[MeSH Terms]) OR chronic pain[MeSH Terms]) OR repetitive[Title/Abstract]) OR functional[Title/Abstract]) OR mechanical[Title/Abstract]) OR recurrent[Title/Abstract]) OR repeated[Title/Abstract]) OR chronic\*[Title/Abstract])) AND ((((((ankle injuries[MeSH Terms]) OR (sprains and strains[MeSH Terms])) OR joint instability[MeSH Terms]) OR sprain[Title/Abstract]) OR injur\*[Title/Abstract]) OR instability\*[Title/Abstract])) AND ((((((meta-analysis[MeSH Terms]) OR meta-analysis as topic[MeSH Terms]) OR systematic review[Title/Abstract]) OR meta-analysis[Title/Abstract]) OR meta analysis[Title/Abstract])) AND ((((((ankle[MeSH Terms]) OR ankle joint[MeSH Terms]) OR lateral ligament, ankle[MeSH Terms]) OR ankle[Title/Abstract]) OR talocrural OR talo-crural OR talo-calcaneal[Title/Abstract]))

### **MEDLINE**

((MH "Review") OR (MH "Meta-Analysis") OR (MH "Meta-Analysis as Topic") OR systematic review OR meta-analysis OR meta analysis) AND ((MH "Ankle") OR (MH "Ankle Joint") OR (MH "Lateral Ligament, Ankle") OR ankle\* OR talocrural OR talo-crural OR talo-calcaneal) AND ((MH "Ankle Injuries") OR (MH "Sprains and Strains") OR (MH "Joint Instability") OR sprain OR injur\* OR instability\*) AND ((MH "Cumulative Trauma Disorders") OR (MH "Chronic Pain") OR perceived OR repetitive OR functional OR mechanical OR recurrent OR repeated OR chronic)

### **Scopus**

INDEXTERMS(Review OR Meta-Analysis OR Meta-Analysis as Topic) OR TITLE-ABS-KEY(systematic review OR meta-analysis OR meta analysis) AND INDEXTERMS(Ankle OR Ankle Joint OR Lateral Ligament, Ankle) OR TITLE-ABS-KEY(ankle\* OR talocrural OR talo-crural OR talocalcaneal) AND INDEXTERMS(Ankle Injuries OR Sprains and Strains OR Joint Instability) OR TITLE-ABS-KEY(sprain OR injur\* OR instability\*) AND INDEXTERMS(Cumulative Trauma Disorders OR Chronic Pain) OR TITLE-ABS-KEY(perceive OR repetitive OR functional OR mechanical OR recurrent OR repeated OR chronic)]

### **SportDiscus**

(( "Review"[Mesh] OR "Meta-Analysis"[Mesh] OR "Meta-Analysis as Topic"[Mesh] OR systematic review OR meta-analysis OR meta analysis) AND ("Ankle"[Mesh] OR "Ankle Joint"[Mesh] OR "Lateral Ligament, Ankle"[Mesh] OR ankle\* OR talocrural OR talo-crural OR talocalcaneal) AND ( "Ankle Injuries"[Mesh] OR "Sprains and Strains"[Mesh] OR "Joint Instability"[Mesh] OR sprain OR injur\* OR instability\*) AND ("Cumulative Trauma Disorders"[Mesh] OR "Chronic Pain"[Mesh] OR perceived OR repetitive OR functional OR mechanical OR recurrent OR repeated OR chronic)
